# Supplementary material
Source: Springer Nature journal article supplement (https://www.springermedizin.de/resource/supplementary/12889_2012_5263_MOESM1_ESM.docx/9494976)
Supplement: MOESM1 [file 9494976]

|  | **Individual interviews** | | **Focus Groups** | | **TOTAL NO. OF INTERVIEWS** |
| --- | --- | --- | --- | --- | --- |
| **Adults** | **Children** | **Adults** | **Children** |
| **Key Informants** | 15 | 0 | 1 (9 people) | 0 | 16 |
| **Cash Transfer Beneficiaries** | 6 | 1 | 1 (9 people) | 0 | 8 |
| **Conditional Cash Transfer Beneficiaries** | 5 | 3 | 0 | 0 | 8 |
| **Non-beneficiaries** | 5 | 0 | 1 (9 people) | 0 | 6 |
| **TOTAL NO, OF PEOPLE** | 31 | 4 | 27 | 0 | 38  62 |

**Table 1**: Summary of study informants
